# Supplementary material for: Hematopoietic cell transplantation and cellular therapy survey of the EBMT: monitoring of activities and trends over 30 years
Source: PubMed Central journal article supplement (PMC8263343; doi:10.1038/s41409-021-01227-8), 2021-02-23
Supplement: 41409_2021_1227_MOESM1_ESM.pdf [file 41409_2021_1227_MOESM1_ESM.pdf]

## APPENDIX 2019

### EBMT Transplant Activity Survey: List of reporting transplant centers in 2019

(Number of reporting centers: total 1st HCT (total all HCT) N allogeneic 1st HCT / N autologous 1st HCT)

#### **Algeria:** (2 teams: 357 (363) 155/202)

Alger, Centre Pierre et Marie Curie, (ads, peds), CIC 703, R. Hamladji (195 (201) 143/52)

Oran, University Hospital of Oran, (ads, peds), CIC 993, M. Bekadja (162 (162) 12/150)

#### **Armenia:** (1 team: 12 (12) 0/12)

Yerevan, Hematology Centre after Prof. R. Yeolyan, (ads, peds), K. Meliksetyan, S. Dagbashyan (12 (12) 0/12)

#### **Austria:** (13 teams: 550 (630) 214/336)

Graz, University of Graz, (ads), CIC 308, H. Greinix, H. Sill (86 (95) 37/49)

Graz, Universitäts Kinderklinik, (peds), CIC 593, C. Urban, W. Schwinger (9 (9) 7/2)

Innsbruck, University Hospital, (ads, peds), CIC 271, D. Wolf, D. Nachbaur (84 (95) 34/50)

Klagenfurt, Klinikum Klagenfurt, (ads), S. Eder (13 (16) 0/13)

Linz, Kepler University Hospital, (ads), CIC 343, C. Schimitt (8 (8) 0/8)

Linz, AOKH der Elisabethinen, (ads), CIC 594, J. Clausen, M. Binder (99 (123) 47/52)

Salzburg, LKA Salzburg, (ads), CIC 356, R. Greil, G. Rass (24 (30) 0/24)

St. Pölten, University Hospital St. Pölten, (ads), CIC 474, G. Krajnik, Ch. Fertl (8 (10) 0/8)

Vienna, Universitätsklinik für Innere Medizin-AKH, (ads), CIC 227, P. Kalhs, P. Rabitsch (105 (118) 68/37)

Vienna, St. Anna Kinderspital, (peds), CIC 528, H. Pichler, W. Holter, S. Karlhuber (28 (32) 21/7)

Vienna, Hanusch- Krankenhaus, (ads), CIC 743, F. Keil (46 (50) 0/46)

Vienna, Donauspital, (ads), CIC 767, C. Sebesta, P. Kier (14 (16) 0/14)

Vienna, Wilhelminenspital, (ads), CIC 828, W. Hilbe, N. Zojer (26 (28) 0/26)

#### **Azerbaijan:** (1 team: no report)

Baku, Republican Thalassemia Centre, (peds), N. Aliyeva Rafiq, S. Saila Rauf (no report)

#### **Republic of Belarus:** (2 teams: 199 (208) 55/144)

Minsk, Scientific Centre of Surgery, Transplantology and Hematology, (ads), N. Milanovich (148 (148) 27/121)

Minsk, Belorussian Center, (peds), CIC 591, O. Aleinikova, Y. Mareika (51 (60) 28/23)

#### **Belgium:** (17 teams: 896 (960) 424/472)

Antwerp, Stuivenberg ZH, (ads), CIC 339, W. Ka Lung (37 (37) 24/13)

Antwerp, University Antwerpen, (ads), CIC 996, W. Schroyens, Z. Berneman (60 (61) 36/24)

Brugge, A.Z. St. Jan, (ads), CIC 506, D. Selleslag, J.v. Droogenbroeck (80 (86) 41/39)

Brussels, Institut Jules Bordet and the Childrens Hospital, (ads, peds), CIC 215, D. Bron, C. Devalck, A. Ferster (77 (84) 49/28)

Brussels, Clinique Universitaire St. Luc, (ads, peds), CIC 234, X. Poiré, C. Vermeylen (66 (69) 49/17)

Brussels, U.L.B. Hôpital Erasme, (ads), CIC 596, V. De Wilde (10 (10) 0/10)

Brussels, University Hospital, (ads), CIC 630, R. Schots, F. Trullemans (41 (49) 14/27)

Charleroi, Grand Hôpital de Charleroi Notre-Dame, (ads), CIC 349, D. Pranger (12 (16) 0/12)

Gent, University Hospital, (ads, peds), CIC 744, C. Dhooge, T. Kerre, V. Bordon (114 (116) 53/61)

Haine St. Paul, Hôpital de Jolimont, (ads), CIC 234:3, H. Petre, F. Van Obbergh (15 (17) 0/15)

Hasselt, Jessa Ziekenhuis, (ads), CIC 632, K. Theunissen (46 (48) 0/46)

Leuven, University Hospital Gasthuisberg and Leuven, (ads, peds), CIC 209, J. Maertens, G. Verhoef, A. Uyttebroeck, M. Renard (139 (145) 75/64)

Liège, University Hospital Sart-Tilman, (ads, peds), CIC 726, Y. Béguin, B de Prijck (88 (102) 46/42)

Roeselare, AZ Delta, H. Hart Ziekenhuis, (ads), CIC 646, D. Deeren (24 (27) 14/10)

Turnhout, AZ Turnhout, (ads), CIC 910, I. Vrelust, B. Hodossy (17 (17) 0/17)

Wilrijk-Antwerp, St. Agustinus Hospital, (ads), CIC 715, J. Lemmens, C. Schuermans (22 (24) 0/22)

Yvoir, Clinique universitaire de Mont-Godinne, (ads), CIC 234:2, C. Doyen (48 (52) 23/25)

#### **Bosnia-Herzegovina:** (2 teams: 27 (34) 1/27)

Sarajevo, Clinical Centre, (ads), CIC 198, A. Sofo-Hafizovic (23 (30) 0/23)  
Tuzla, University Clinical Centre, (ads), H. Sahovic (4 (4) 0/4)

**Bulgaria:** (2 teams: 32 (32) 23/9)

Sofia, University Hospital Queen Johanna-Isul, (peds), CIC 346, D. Konstantinov, B. Avramova (7 (7) 2/5)

Sofia, National Centre of Hematology, (ads), CIC 859, B. Spassov, G. Arnaudov, K. Simeonova (25 (25) 21/4)

**Croatia:** (3 teams: 227 (272) 88/139)

Zagreb, University Hospital Rebro, (ads, peds), CIC 302, R. Vrhovac, R. Serventi-Seiwerth (154 (173) 88/66)

Zagreb, University Hospital Dubrava, (ads), CIC 407, V. Pejisa, O. Jaksic (21 (25) 0/21)

Zagreb, Hospital Merkur, (ads), CIC 466, D. Radic-Kristo, V. Zatezalo (52 (74) 0/52)

**Cyprus:** (1 team: 22 (22) 0/22)

Nicosia, Nicosia General Hospital, (ads), CIC 575, K. Melanthiou, C. Stylianou (22 (22) 0/22)

**Czech Republic:** (9 teams: 587 (742) 227/360)

Brno, Masaryk University Hospital, (ads, peds), CIC 597, J. Mayer, Z. Racil, J. Sterba (96 (120) 30/66)

Hradec Kralové, Charles University Hospital, (ads), CIC 729, P. Zak (50 (60) 28/22)

Olomouc, University Hospital, (ads), CIC 574, E. Faber (61 (72) 22/39)

Ostrava, University Hospital Ostrava, (ads), CIC 156, R. Hajek (59 (104) 0/59)

Pilsen, Charles Hospital, (ads), CIC 718, P. Jindra, A. Jungova (117 (144) 44/73)

Prague, Charles University Hospital, (ads), CIC 318, T. Kozak (29 (30) 0/29)

Prague, University Hospital Motol, (peds), CIC 452, P. Sedlacek (40 (50) 28/12)

Prague, Institute of Hematology and Blood Transfusion, (ads), CIC 656, A. Vitek (75 (80) 75/0)

Prague, Charles University, (ads), CIC 745, M. Trneny (60 (82) 0/60)

**Denmark:** (4 teams: 314 (342) 173/141)

Aalborg, Aalborg Hospital, (ads), CIC 848, I. Christiansen, J. Baech, K.Nielsen (31 (35) 0/31)

Aarhus, Aarhus Amtssygehus, (ads, peds), CIC 634, M. Thorsgaard (98 (106) 51/47)

Copenhagen, Rigshospitalet, (ads, peds), CIC 206, H. Sengelov, C. Heilmann (161 (173) 122/39)

Copenhagen, Herlev Hospital, (ads), CIC 568, P. Josefsson, P. Andersen (24 (28) 0/24)

**Estonia:** (2 teams: 80 (87) 22/58)

Tallinn, North Estonia Medical Centre, (ads), CIC 984, K. Palk (37 (43) 0/37)

Tartu, University Hospital, (ads, peds), CIC 746, A.Kaare (43 (44) 22/21)

**Finland:** (7 teams: 383 (402) 140/243)

Helsinki, Children's Hospital, (peds), CIC 219, K. Vettenranta (22 (23) 18/4)

Helsinki, Helsinki University Central Hospital, (ads), CIC 515, R. Niittyvuopio (119 (125) 74/45)

Helsinki, Helsinki University Hospital, (ads), CIC 833, R. Janes, S. Leppä (19 (19) 0/19)

Kuopio, University Hospital, (ads), CIC 396, E. Jantunen, A. Partanen (41 (44) 0/41)

Oulu, Oulu University Central Hospital, (ads, peds), CIC 690, M. Säily (35 (38) 0/35)

Tampere, University Hospital, (ads, peds), CIC 635, M. Sankelo, M. Sinisalo (44 (46) 0/44)

Turku, University Central Hospital, (ads, peds), CIC 225, U. Salmenniemi, M. Itäla-Remes (103 (107) 48/55)

**France:** (73 teams: 4,598 (5,019) 1,837/2,761)

Amiens, CHU d'Amiens, (ads), CIC 955, A. Charbonnier, J.P. Marolleau (97 (97) 46/51)

Angers, Centre Hospitalier, (ads, peds), CIC 650, M. Hunault-Berger, S. Francois (91 (103) 34/57)

Argenteuil, Hôpital Victor Dupouy, (ads), CIC 199, P. Genet (23 (27) 0/23)

Arras, Groupe Hospitalier Artois Ternois, (ads), CIC 999, P. Lionne-Huyghe (8 (8) 0/8)

Bayonne, C.H. De la Cote Basque, (ads), S. Labarrere, A. Banos (19 (21) 0/19)

Besancon, Hôpital Jean Minjoz and St.Jacques, (ads, peds), CIC 233, E.Deconinck (81 (81) 50/31)

Bobigny, Hôpital Avicenne, (ads), S. Brechignac, C. Gardan (no report)

Bordeaux, CHU Hopitalier Pellegrin- Enfants, (peds), CIC 978, C. Jubert, Y. Perel (28 (30) 19/9)

Boulogne sur Mer, CHU Hôpital Duchenne, (ads), CIC 873, M. Barry, K. Debbache (0 (0) 0/0)

Brest, Hopital Morvan, CHU de Brest, (ads, peds), S. Creachcadec, G. Guillerm, C. Berthou (62 (72) 24/38)  
 Caen, CHU Caen Institut d'hématologie de Basse-Normandie CHU, (ads), CIC 251, G. Damaj, S. Chantepeie (63 (70) 27/36)  
 Clermont Ferrand, CRCTCP, CHU Estaing, (ads, peds), CIC 273, J.-O. Bay (114 (121) 47/67)  
 Colmar, Louis Pasteur Hospital, ads, JM. Limacher (no report)  
 Corbeil Essonne, Hopital Gilles de Corbeil, (ads), A. Devidas, B. Joly (22 (22) 0/22)  
 Créteil, Hôpital Henri Mondor, (ads), CIC 252, C. Cordonnier, S. Maury (34 (41) 33/1)  
 Créteil, Hôpital Henri Mondor, (ads), CIC 432, C. Haioun, J. Dupuis (44 (64) 0/44)  
 Dijon, Hôpital des Enfants, (ads), D. Caillot (71 (81) 0/71)  
 Dunkerque, Centre Hospitalier, (ads), J-M. Pignon, M. Wetterwald (14 (17) 0/14)  
 Grenoble, CHV Grenoble Alpes, (ads, peds), CIC 270, J.Y. Cahn, C.E. Bulabois (111 (137) 59/52)  
 La Réunion, CHU Felix Guyon, Saint Denis Centre, (ads), S. Vanderbecken (18 (19) 0/18)  
 La Réunion, St. Pierre CHU Sud La Réunion, (ads), C. Mohr, C. Garnier (27 (32) 0/27)  
 Le Chesnay, Hôpital André Mignot, Versailles, (ads), Ph. Rousselot, S. Castaigne (34 (34) 0/34)  
 Lens, Service d'Hématologie, (ads), Bories, L. Stalnikiewicz (22 (22) 0/22)  
 Lille, Centre Hospitalier Saint Vincent, (ads), B. Carpentier, L. Pascal (18 (18) 0/18)  
 Lille, Centre Oscar Lambret, (peds), A. Defachelles (7 (11) 0/7)  
 Lille, Hôpital Claude Huriez, (ads), CIC 277, I. Yakoub-Agha (129 (146) 91/38)  
 Lille, Hôpital Jeanne de Flandre, (peds), CIC 963, B. Bruno, B. Nelken (16 (16) 15/1)  
 Limoges, CHU Dupuytren, (ads), CIC 977, P. Turlure, D. Bordessoule (69 (69) 30/39)  
 Lyon, Centre Léon Bérard, (ads), CIC 241, E. Nicolas-Virelizier (79 (96) 0/79)  
 Lyon, Centre Hospitalier Lyon Sud, (ads), CIC 671, H. Labussiere-Wallet (73 (76) 73/0)  
 Lyon, Institue d'Hématologie et d'Oncologie Pédiatrique, (peds), CIC 806, Y. Bertrand (50 (55) 34/16)  
 Lyon, Hospices Civils de Lyon, (ads), CIC 901, G. Salles (86 (89) 0/86)  
 Marseille, Institut Paoli I. Calmettes, (ads), CIC 230, D. Blaise, C. Chabannon (227 (243) 121/106)  
 Marseille, Hôpital Timone Enfants, (peds), CIC 301, G. Michel, C. Coze (36 (39) 24/12)  
 Marseille Bouches du Rhone, Centre Hospitalier Universitaire La Conception, (ads), CIC 158, R. Costello (24 (24) 0/24)  
 Meaux, CHU de Meaux, (ads), CIC 194, J. Frayfer, L. Fouillard (14 (18) 0/14)  
 Metz, CHR de Metz-Thionville, ads, V. Morel-Dorvaux (no report)  
 Montpellier, CHR Lapeyronie and CHU Arnaud de Villeneuve, (ads, peds), CIC 926, N. Fegueux, A. Sirvent (197 (202) 65/132)  
 Mulhouse, Hôpital E. Muller, (ads), CIC 944, B. Drénou, M. Ojeda-Urbe (26 (27) 0/26)  
 Nantes, CHU Nantes, (ads, peds), CIC 253, P. Chevallier, S. Legouill, F. Rialland (160 (185) 72/88)  
 Nice, Hôpital de l'Archet, (ads, peds), CIC 523, P. Rohrllich, T. Cluzeau (68 (70) 44/24)  
 Nice, Centre Antoine Lacassagne, (ads), CIC 973, A. Thyss (53 (53) 0/53)  
 Orleans, CHR Orléans, Hôpital de la Source, (ads), M. Alexis, C. Benbrahim (25 (26) 0/25)  
 Paris, Clarmart, Hopital d'Instruction des Armées Percy, (ads), JV. Malfuson (45 (50) 15/30)  
 Paris, Hôpital Cochin, (ads), D. Bouscary (47 (54) 0/47)  
 Paris, Hôpital d'enfants Armand Trousseau, (peds), G. Leverger, A. Auvrignon (5 (5) 0/5)  
 Paris, Immuno-Hématologie, Hôpital St. Louis, (ads), B. Arnulf (68 (75) 0/68)  
 Paris, Hôpital Necker, (ads), CIC 160, O. Hermine, F. Suarez (88 (91) 46/42)  
 Paris, Hôpital Necker des enfants malades, (peds), CIC 201, B. Neven, S. Blanche (48 (51) 48/0)  
 Paris, Hôpital St. Louis, (ads, peds), CIC 207, G. Socié, M. Robin, R Peffault de La Tour (123 (126) 117/6)  
 Paris, Hôpital Pitié Salpêtrière, (ads), CIC 262, V. Leblond, S. Nguyenquoc (111 (122) 57/54)  
 Paris, Hôpital Robert Debré, (peds), CIC 631, JH. Dalle, A. Baruchel (44 (53) 43/1)  
 Paris, Institut Curie, (ads, peds), CIC 702, J. Michon, Ph. Brault (32 (37) 0/32)  
 Paris, Hôpital Tenon, (ads), CIC 747, J.P. Lotz, F. Selle (16 (24) 0/16)  
 Paris, Hôpital St. Antoine, (ads), CIC 775, M. Mohty, S. Lapusan (119 (130) 62/57)  
 Paris, Hôpital St. Louis, (ads), CIC 805, C. Thieblemont (21 (21) 0/21)  
 Paris, Hôpital St. Louis, ads, H. Dombret, L. Degos, P. Rousselot (no report)  
 Pessac, Hôpital du Haut Leveque, CHU Bordeaux, (ads), CIC 267, N. Milpied, E. Forcade (177 (194) 81/96)  
 Poitiers, CHU de Poitiers, Hôpital La Miletrie, (ads, peds), CIC 264, X. Leleu, M. Maillard, (126 (134) 40/86)  
 Pontoise, Hospital René Dubos, (ads), H. Gonzalez, I. Vaida (20 (20) 0/20)  
 Reims, Hôpital Robert Debré, (ads), CIC 959, A. Delmer, C. Himerlin (52 (53) 0/52)  
 Rennes, CHU Rennes, (ads), CIC 6611, T. Lamy, M Bernard (122 (129) 49/73)

Rennes, Clinique Médical Infantile, CHRU, (peds), CIC 6612, V. Gandemer (28 (29) 19/9)  
 Roubaix, Hôpital V. Provo, (ads), I. Plantier-Colcher (7 (7) 0/7)  
 Rouen, Hôpital Charles Nicolle, (peds), P. Schneider, N. Buchbinder (15 (15) 15/0)  
 Rouen, Centre Henri Becquerel, (ads), CIC 941, H. Tilly, N. Contentin (78 (85) 31/47)  
 Saint Priest en Jarez, 'Institut de Cancérologie Lucien Neuwirth, (ads), CIC 250, D. Guyotat, J. Cornillon (62 (69) 24/38)  
 Saint Quentin, Centre Hospitalier De Saint Quentin, (ads), CIC 406, R. Garidi (7 (7) 0/7)  
 St. Cloud, Institut Curie, Hôpital René Huguenin, (ads), S. Glaisner (55 (61) 0/55)  
 Strasbourg, Nouvel Hôpital Civil, (ads, peds), CIC 672, B. Lioure, E. Kurtz, P. Lutz (137 (142) 57/80)  
 Toulouse, Hôpital Purpan, (peds), H. Rubie, G. Alphonsa (7 (9) 0/7)  
 Toulouse, Institut Universitaire du Cancer Toulouse Oncopole, (ads), CIC 624, A. Huynh, C. Recher (178 (187) 72/106)  
 Tours, Hôpital Bretonneau, (ads, peds), CIC 272, E. Gyan, L. Sutton (71 (75) 11/60)  
 Troyes, Centre Hospitalier de Troyes, (ads), CIC 472, A. Santagostino (no report)  
 Valenciennes, Centre Hospital de Valenciennes, (ads), M. Simon, N. Cambier (21 (21) 0/21)  
 Vandoeuvre-les-Nancy, Hôpital d'Enfants and Brabois, (ads, peds), M. Rubio, P. Feugier, A. Campidelli, C. Pochon (124 (129) 60/64)  
 Villejuif, Institut Gustave Roussy, (peds), CIC 503, D. Valteau-Couanet (22 (36) 0/22)  
 Villejuif, Gustave Roussy Cancer Campus, (ads), CIC 666, J-H. Bourhis, C. Castilla-Llorente (182 (216) 82/100)

**Georgia:** (no report)

Tbilisi, High Technology Medical Center, (ads), G. Ingorokva (no report)

**Germany:** (116 teams: 6,740 (7,926) 3,158/3,582)

Aachen, Universitätsklinikum, (ads), T. Brümmendorf, E. Jost (67 (76) 34/33)  
 Aachen, Universitätsklinikum, (peds), CIC 348, U. Kontny (6 (7) 6/0)  
 Augsburg, Klinikum Augsburg, (ads, peds), CIC 152, C. Schmid (65 (83) 41/24)  
 Bad Saarow, Humaine Klinikum, (ads), R. Ratei (14 (22) 0/14)  
 Bayreuth, Klinikum Bayreuth, (ads), A. Kiani, C. Pfeiffer (10 (14) 0/10)  
 Berlin, Vivantes Klinikum Neukoelln, (ads), CIC 105, M de Wit. L. Marretta (28 (48) 0/28)  
 Berlin, Charité, Campus Virchow Klinikum, (peds), CIC 336, J. Schulte (44 (55) 38/6)  
 Berlin, HELIOS Klinikum Berlin Buch, (ads), CIC 518, H. Baurmann (120 (125) 64/56)  
 Berlin, Charite, Campus Virchow Klinikum, (ads), CIC 807, I. Blau (216 (253) 127/89)  
 Bielefeld, Evangelisches Klinikum Bethel, (ads), CIC 116, F. Weissinger (2 (2) 0/2)  
 Bielefeld, Klinikum Bielefeld, (ads), CIC 949, M. Görner (10 (10) 0/10)  
 Bochum, Knappschafts Krankenhaus, (ads), CIC 124, R. Schroers (134 (192) 37/97)  
 Bonn, Johanniter-Krankenhaus und Waldkrankenhaus, (ads), C. Sippel (21 (25) 0/21)  
 Bonn, Universitätsklinikum, (ads), CIC 134, P. Brossart (67 (79) 36/31)  
 Bonn, Universitätsklinikum, (peds), CIC 403, D. Dilloo (6 (9) 2/4)  
 Braunschweig, Städtisches Klinikum, (ads), CIC 674, J. Krauter (42 (49) 0/42)  
 Bremen, Evangelistisch Diakonie-Krankenhaus GmbH, (ads), CIC 111, R.U.Trappe, N. Winkelmann (19 (25) 0/19)  
 Bremen, Klinikum Bremen-Mitte, (ads), CIC 602, B.Hertenstein (49 (52) 18/31)  
 Chemnitz, Klinikum Chemnitz GmbH, (ads), CIC 104, M. Hänel, A.Morgner (48 (59) 7/41)  
 Cottbus, Carl-Thiem-Klinikum, (ads), CIC 102, M. Schmidt-Hieber (14 (26) 0/14)  
 Dortmund, St. Johannes Hospital, (ads), CIC 125, R. Meyer, M.Hindhahl (38 (46) 15/23)  
 Dresden, Universitätsklinikum Carl Gustav Carus, (ads), CIC 808, M. Bornhäuser, J. Schetelig (185 (231) 112/73)  
 Dresden, Universitätsklinikum Carl Gustav Carus, (peds), CIC 808, J. Hauer (10 (10) 6/4)  
 Duisburg, HELIOS Klinikum, (ads), CIC 519, C. Aul (29 (34) 2/27)  
 Düsseldorf, Heinrich Heine Universitätsklinikum, (ads), CIC 390, G. Kobbe (141 (157) 62/79)  
 Düsseldorf, Universitätsklinikum, (peds), CIC 651, A. Borkhardt, R.Meisel (28 (32) 26/2)  
 Erfurt, Helios-Klinikum, (ads), CIC 966, H. Sayer, V. Schmidt (29 (40) 0/29)  
 Erlangen, Universitäts Klinik für Kinder und Jugendliche, (peds), CIC 809, K. D. Stachel (7 (7) 5/2)  
 Erlangen, Universitätsklinikum, (ads), CIC 809, A. Mackensen, W. Rösler, J. Winkler (81 (87) 44/37)  
 Essen, West German Cancer Center, (ads), M. Schuler, S. Bauer (9 (9) 0/9)  
 Essen, Universitätsklinikum, (ads), CIC 126, U. Dührsen, R. Noppeney (73 (92) 0/73)  
 Essen, Universitätsklinikum, (ads), CIC 259, D.W. Beelen, H. Ottinger (148 (155) 148/0)

Essen, Evangelisches Krankenhaus Essen-Werden GmbH, (ads), CIC 784, P.Reimer, M. Wattad (55 (63) 11/44)

Essen, Universitätsklinikum, (peds), CIC 259:2, R. Beier, O. Basu (21 (28) 12/9)

Flensburg, St. Franziskus Hospital, (ads, peds), CIC 970, N. Basara, H. Menzel (22 (26) 10/12)

Frankfurt, J. W. Goethe Universität, (peds), CIC 138, T. Klingebiel, P.Bader (39 (46) 36/3)

Frankfurt, Klinikum Frankfurt Oder, (ads), CIC 190, M. Kiehl (43 (45) 19/24)

Frankfurt, Krankenhaus Bethanien, (ads), CIC 193, W. Knauf (23 (25) 0/23)

Frankfurt, Universitätsklinikum d. J. W. Goethe, (ads), CIC 297, H. Martin, H. Serve (118 (138) 62/56)

Freiburg, Universitätsklinikum, (peds), CIC 810, C. Niemeyer, B. Strahm (19 (22) 15/4)

Freiburg, Universitätsklinikum, (ads), CIC 810, J.Duyster, J. Finke, M.Engelhardt (204 (228) 71/133)

Giessen, Universitätsklinikum, (peds), CIC 326, C. Mauz-Körholz (12 (13) 10/2)

Giessen, Universitätsklinikum, (ads), CIC 463, A. Burchardt, M. Rummel (25 (27) 0/25)

Göttingen, Universitätsklinikum, (ads), CIC 552, G. Wulf, L. Trümper (136 (170) 69/67)

Greifswald, Universitätsklinikum, (ads), CIC 530, W. Krüger (46 (51) 21/25)

Greifswald, Universitätsklinikum, (peds), CIC 908, H. Lode (6 (6) 3/3)

Hagen, St. Marien Hospital, (ads), CIC 536, H. W. Lindemann (18 (28) 0/18)

Halle, Universitätsklinikum, (ads), CIC 338, L. Müller, T.Weber (100 (114) 56/44)

Halle, Universitätsklinikum, (peds), CIC 654, J. Klusmann, K.Kafa (7 (7) 7/0)

Hamburg, Asklepios Klinik St. Georg, (ads), CIC 153, A. Elmaagacli (71 (74) 52/19)

Hamburg, Asklepios Klinik Altona, (ads), CIC 366, H. Salwender (38 (48) 0/38)

Hamburg, Universitätsklinikum Eppendorf, (ads), CIC 614, N.Kröger (225 (254) 194/31)

Hamburg, Universitätsklinikum Eppendorf, Onkologisches Zentrum, (ads), CIC 673, C. Bokemeyer (30 (36) 0/30)

Hamburg, Universitätsklinikum Eppendorf, (peds), CIC 882, I. Müller (36 (42) 32/4)

Hamm, St. Barbara-Klinik, (ads), CIC 470, H. Duerk (22 (27) 0/22)

Hamm, Evangelisches Krankenhaus, (ads), CIC 509, E.Lange (14 (15) 0/14)

Hannover, Medizinische Hochschule, (ads), CIC 295, A. Ganser (123 (135) 88/35)

Hannover, Medizinische Hochschule, (peds), CIC 295, C. Kratz, KW. Sykora (25 (31) 19/6)

Hannover, Klinikum Siloah, (ads), CIC 342, K. Marienhagen (27 (34) 0/27)

Heidelberg, Angelika Lautenschläger-Klinik, (peds), CIC 524, A. Kulozik, J. Greil (13 (14) 9/4)

Heidelberg, Universitätsklinikum, (ads), CIC 524, C. Müller-Tidow, P. Dreger (256 (330) 114/142)

Herne, Marien Hospital, (ads), CIC 886, D. Strumberg (3 (3) 0/3)

Homburg/Saar, Universität des Saarlandes, (ads), CIC 785:1, N. Bittenbring (96 (116) 36/60)

Homburg/Saar, Universität des Saarlandes, (peds), CIC 785:2, N. Graf, T. Krenn (1 (1) 0/1)

Jena, Universitätsklinikum, (ads), CIC 533, I. Higendorf, A. Hochhaus (90 (105) 44/46)

Jena, FS Universitäts-Kinderklinik, (peds), CIC 750, J. Beck, B. Gruhn (10 (14) 6/4)

Kaiserslautern, Westpfalz-Klinikum, (ads), CIC 357, G. Held (16 (21) 0/16)

Karlsruhe, Städtische Klinik, (ads), CIC 290, M.Bentz, M. Ringhoffer (47 (61) 22/25)

Kassel, Klinikum Kassel, (ads, peds), M. Wolf, E. Steinhauer, M. Nathrath (25 (38) 0/25)

Kiel, Universitätsklinikum Schleswig-Holstein, (ads), CIC 256, M.Gramatzki (85 (107) 43/42)

Kiel, Universitätsklinikum Schleswig-Holstein, (peds), CIC 256, M. Schrappe (4 (6) 2/2)

Koblenz, Stiftungsklinikum Mittelrhein, (ads), CIC 879, D.Niemann (21 (26) 0/21)

Köln, Universitätsklinikum, (ads, peds), CIC 534, M. Hallek, Ch. Scheid (193 (206) 91/102)

Leipzig, Universitätsklinikum, (ads), CIC 389, U. Platzbecker (136 (153) 60/76)

Leipzig, Universitätsklinikum, (peds), CIC 389, H. Christiansen (16 (16) 14/2)

Lemgo, Klinikum Lippe, (ads), F. Hartmann C.Constantin (16 (21) 0/16)

Lübeck, Universitätsklinikum Schleswig Holstein, (ads), CIC 367:1, F. Wortmann (41 (43) 15/26)

Lübeck, Universitätsklinikum Schleswig Holstein, (peds), CIC 367:2, M. Lauten (1 (1) 0/1)

Ludwigshafen, klinikum der Stadt, (ads), CIC 140, M.Hoffmann (10 (14) 0/10)

Magdeburg, Universitätsklinikum, (ads), CIC 359, T. Heinicker, R. Bartsch (34 (43) 12/22)

Mainz, Universitätsklinikum, (ads), CIC 786, E. Wagner-Drouet, M. Theobald (172 (185) 101/71)

Mannheim, Universitätsklinikum, (ads), CIC 142, W K. Hofmann, S. Klein (43 (52) 24/19)

Marburg, Philipps Universitätsklinikum, (ads), CIC 645, A. Neubauer, A. Burchert (110 (122) 55/55)

Minden/Westfalen, Klinikum Minden, (ads), CIC 113, H. Tischler (48 (62) 0/48)

Möchengladbach, Klinikum Maria Hilf II, KH St. Franziska, (ads), CIC 120, U.Graeven (11 (11) 0/11)

Munich, Klinikum Schwabing, (ads), CIC 151, A. Hausmann (72 (80) 29/43)

Munich, Klinikum Schwabing, (peds), CIC 189, S.Burdach, A.Wawer (8 (8) 5/3)

Munich, Haunersches Kinderspital Klinikum Grosshadern, (peds), CIC 513, M. Albert (31 (32) 27/4)

Munich, Universitätsklinikum Grosshadern, (ads), CIC 513, J.Tischer (99 (102) 59/40)

Munich, Klinikum Rechts der Isar, (ads), CIC 558, M. Verbeek (102 (126) 52/50)

Munich, Rotkreuz Klinikum, (ads), CIC 883, M. Hentrich (59 (99) 0/59)  
 Münster, Universitätsklinikum Münster, (peds), CIC 505, C. Rössig (36 (40) 28/8)  
 Münster, Universitätsklinikum, (ads), CIC 680, M. Stelljes (250 (276) 150/100)  
 Nürnberg, Klinikum Nuernberg, (ads), CIC 625, M.Wilhelm, K. Schäfer-Eckart (62 (73) 32/30)  
 Oldenburg, Universitätsklinikum, (ads), CIC 749, B. Metzner, CH.Köhne, J. Caspar (91 (111) 32/59)  
 Osnabrück, Klinikum Osnabrück, (ads), CIC 101, R.Peceny (23 (26) 0/23)  
 Paderborn, St. Josef Paderborn, (ads), CIC 936, T. Gaska (10 (14) 0/10)  
 Potsdam, Klinikum Ernst von Bergmann, (ads), CIC 106, G. Maschmeyer (32 (40) 0/32)  
 Regensburg, Universitätsklinikum, (ads), CIC 787, E. Holler (162 (196) 70/92)  
 Regensburg, Universitätsklinikum, (peds), CIC 787, S. Corbacioglu (20 (23) 17/3)  
 Rostock, Universitätsklinikum, (ads), CIC 585, C. Junghanss (41 (54) 19/22)  
 Schwerin, Helios Klinik Schwerin, (ads), CIC 447, A. Günther (35 (42) 17/18)  
 Siegen, St. Marien-Krankenhaus, (ads), CIC 135, R. Naumann (19 (24) 0/19)  
 Stuttgart, Klinikum Stuttgart, Katharinenhospital, (ads), CIC 143, G. Illerhaus (51 (58) 10/41)  
 Stuttgart, Robert Bosch Krankenhaus, (ads), CIC 145, S. Martin, W. Aulitzky, M.Kaufmann (80 (81) 36/44)  
 Stuttgart, Diakonissen Krankenhaus, (ads), CIC 146, J. Greiner, S. Von Harsdorf (52 (61) 24/28)  
 Stuttgart, Universitätsklinikum Olgahospital, (peds), CIC 701, S. Bielack, E. Koscielniak (4 (4) 0/4)  
 Tübingen, Universitätsklinikum, (ads), CIC 223, L. Kanz, C.Faul (137 (156) 70/67)  
 Tübingen, Universitätsklinikum, (peds), CIC 535, R. Handgretinger, P.Lang (39 (42) 32/7)  
 Ulm, Kinderklinik Universitätsklinikum, (peds), CIC 204, A.Schulz (31 (32) 27/4)  
 Ulm, Universitätsklinikum, (ads), CIC 204, D. Bunjes, H. Döhner (161 (167) 72/89)  
 Wiesbaden, Dr. Horst Schmidt Klinikum, (ads), CIC 586, N. Frickhofen, A. Brecht (21 (22) 0/21)  
 Winnenden, Rems-Murr Klinikum, (ads), CIC 180, M. Schaich (18 (23) 0/18)  
 Wümme, Diakoniekrankenhaus Rotenburg, (ads), CIC 871, F.Heits (23 (25) 0/23)  
 Würzburg, Universitätsklinikum, (peds), CIC 196, P. Schlegel (13 (16) 11/2)  
 Würzburg, Universitätsklinikum, (ads), CIC 712, H.Einsele (195 (258) 74/121)

**Greece:** (12 teams: 349 (366) 189/160)

Alexandroupolis, Thrace University Medical School, (ads), I. Kotsianidis (0 (0) 0/0)  
 Athens, Athens Medical Center, (ads), A. Pigaditou (3 (3) 0/3)  
 Athens, G. Gennimatas Hospital, (ads), T.Marinakis, G. Gkortzolidis (9 (9) 0/9)  
 Athens, Laikon General Hospital, ads, CIC 438, J. Meletis, M. Angelopoulou (no report)  
 Athens, Attikon University General Hospital, (ads), CIC 604, P. Tsirigotis (36 (36) 32/4)  
 Athens, Evangelismos Hospital, (ads), CIC 622, N.Harhalakis, D.Karakasis (54 (60) 34/20)  
 Athens, Diagnostic & Therapeutic Center 'Hygeia', (ads), CIC 643, G. Karianakis (6 (6) 0/6)  
 Athens, Hellenic Cancer Institute St. Savvas, (ads), CIC 751, A.Pouli (33 (34) 0/33)  
 Athens, Aghia Sophia Childrens Hospital, (peds), CIC 752, V. Kitra-Roussos (49 (52) 41/8)  
 Crete, University Hospital, ads, H. Papadaki, C. Kalpadaki (no report)  
 Heraklion, Crete, University Hospital Heraklion, (peds), CIC 10788, E. Stiakaki (1 (1) 0/1)  
 Patras, University Hospital of Patras, (ads), CIC 281, A. Spyridonidis, M. Liga (38 (39) 33/5)  
 Piraeus, Metaxa Cancer Hospital, (ads), CIC 937, C. Kosmas, E.Lianos, E. Fergadis (4 (6) 0/4)  
 Thessaloniki, The George Papanicolaou General Hospital, (ads, peds), CIC 561, A. Anagnostopoulos (116 (120) 49/67)

**Hungary:** (5 teams: 379 (402) 116/263)

Budapest, Dél-pesti Centrumkórház, National Institute of Hematology, (ads), CIC 556, P.Remenyi (191 (201) 81/110)  
 Budapest, Central Hospital of Southern Pest, (peds), CIC 824, G. Kriván (31 (39) 15/16)  
 Debrecen, University of Debrecen, (ads), CIC 648, A. Illes, L. Gergely (96 (99) 16/80)  
 Miskolc, GYEK, Child Health Centre, (peds), CIC 599, R. Simon, A.Kelemen (9 (9) 4/5)  
 Pécs, University of Pécs, (ads), CIC 682, A.Szomor (52 (54) 0/52)

**Iceland:** (1 team: 19 (21) 0/19)

Reykjavik, National University Hospital, (ads), CIC 605, S. Reykdal (19 (21) 0/19)

**Iran:** (5 teams: 629 (639) 358/271)

Shiraz, Shiraz University of Medical Sciences, Nemazee Hospital, (ads, peds), CIC 188, M. Ramzi (183 (191) 66/117)  
 Teheran, Shariati Hospital, SCT Research Centre, (ads, peds), CIC 633, A. Mousavi (300 (300) 178/122)

Teheran, Childrens Medical Centre, (peds), CIC 856, Amir Ali Hamidieh (92 (94) 86/6)  
Teheran, Taleghani Hospital Blood and Marrow Transplantation Center, ads, peds, CIC 916, M. Mehdizadeh, A. Hajifathali (no report)  
Teheran, Mofid Children Hospital, (peds), CIC 10190, B. Shahin Shamsian (35 (35) 27/8)  
Teheran, Mahak Children's Cancer Hospital, peds, CIC 10224, A. Mehrvar (no report)  
Urmia, Urmia Medical Sciences University, (ads), R. Asghari (19 (19) 1/18)

**Iraq:** (1 team: 73 (73) 36/37)

Sulaimania Kurdistan, HIWA Cancer Hospital, (ads, peds), CIC 847, D. Othman, Chra. Abdullah (73 (73) 36/37)

**Ireland:** (4 teams: 237 (270) 79/158)

Dublin, St.James Hospital, (ads, peds), CIC 257, P. Browne, P.J. Hayden (135 (149) 67/68)  
Dublin, St. Vincent's Hospital, (ads), CIC 541, K. Fadalla (18 (18) 0/18)  
Dublin, Our Lady's Hospital of Sick Children, Crumlin, (peds), CIC 774, A. O'Marcaigh (22 (30) 12/10)  
Galway, Galway University Hospitals, (ads), CIC 408, A. Hayat (62 (73) 0/62)

**Israel:** (10 teams: 779 (878) 399/380)

Beer Sheba, Soroka University Medical Center, (ads), CIC 481, I. Levy (30 (30) 7/23)  
Haifa, Rambam Medical Center, (ads, peds), CIC 345, T. Zuckerman (136 (151) 64/72)  
Jerusalem, Hadassah University Hospital, (ads, peds), CIC 258, P. Stepensky (110 (119) 64/46)  
Petach-Tikva, Beilinson Hospital, (ads), CIC 409, M. Yeshurun (89 (96) 46/43)  
Petach-Tikva, Childrens Medical Center, (peds), CIC 755, J. Stein (47 (52) 36/11)  
Revohot, Kaplan Hospital, (ads), CIC 327, L. Shvidel (8 (11) 0/8)  
Tel Aviv, Tel Aviv Sourasky Medical Center, (ads), CIC 161, R. Ram (100 (117) 43/57)  
Tel Aviv, Dana-Dwek Children's Hospital, Sourasky Medical Centre, (peds), CIC 670, R. Elhasid (11 (21) 3/8)  
Tel Hashomer, Chaim Sheba Medical Center, (peds), CIC 572, A. Toren (49 (56) 32/17)  
Tel Hashomer, Sheba Medical Center, (ads), CIC 754, A. Nagler, A. Shimoni (199 (225) 104/95)

**Italy:** (92 teams: 4,647 (5,490) 1,803/2,844)

Alessandria, S.S. Antonio e Biagio e C. Arrigo, (ads), CIC 825, M. Ladetto, M. Corsetti, F. Salvi, S. Tamiazzo (60 (70) 35/25)  
Ancona, Azienda Ospedale Salesi Riuniti, (peds), P. Pierani, I. Carloni (3 (3) 0/3)  
Ancona, Azienda Ospedale Riuniti di Ancona, (ads), CIC 788, A. Olivieri (65 (65) 30/35)  
Ascoli Piceno, Mazzoni Hospital, (ads), CIC 119, P. Galieni (32 (35) 10/22)  
Avellino, A.O.S. Giuseppe Moscati, (ads), CIC 789, N. Cantore, G. Storti (33 (42) 9/24)  
Aviano, CRO IRCCS Aviano, (ads), CIC 162, M. Michieli, M. Rupolo, M. Mazzucato (31 (43) 0/31)  
Bari, Università degli Studi di Bari, (ads, peds), CIC 649, G. Specchia, P. Carluccio (45 (50) 17/28)  
Bari, IRCCS Istituto Tumori "Giovanni Paolo II", (ads), CIC 934, A. Guarini (24 (24) 0/24)  
Barletta, Hospital of Barletta, (ads), CIC 555, G. Tarantini (18 (18) 0/18)  
Bergamo, ASST Papa Giovanni XXIII, (ads), CIC 658, A. Rambaldi (111 (121) 51/60)  
Bologna, Istituto Ortopedico Rizzoli, (ads, peds), A. Paioli (8 (8) 0/8)  
Bologna, San Orsola-Malpighi Hospital, (ads), CIC 240, F. Bonifazi (137 (164) 51/86)  
Bologna, Policlinico S. Orsola-Malpighi, (peds), CIC 790, A. Pession, A. Prete (20 (21) 13/7)  
Bolzano, Ospedale San Maurizio, (ads), CIC 299, M. Casini, I. Cavattoni (77 (90) 28/49)  
Brescia, Azienda Ospedaliera Spedali Civili Di Brescia, (ads), CIC 141, D. Russo (39 (43) 36/3)  
Brescia, Azienda Spedali Civili, (ads), CIC 288, G. Rossi, A. Re (116 (149) 0/116)  
Brescia, Ospedale dei Bambini Spedali Civili, (peds), CIC 741, F. Porta (23 (26) 20/3)  
Brindisi, Perrino Hospital, (ads), CIC 920, D. Pastore (26 (31) 6/20)  
Busto Arsizio, Ospedale di Circolo di Busto Arsizio, (ads), CIC 927, M. Bregni (15 (22) 0/15)  
Cagliari, Binagh Hospital, Armando Businco Centre, (ads), CIC 811:1, G. La Nasa, E Vacca (47 (59) 22/25)  
Cagliari, Ospedale per le Microcitemie, (peds), CIC 811:2, M. Orofino (7 (7) 7/0)  
Catania, Ospedale Ferrarotto, University of Catania, (ads, peds), CIC 792, G. Milone, G. Moschetti, L. Lo Nigro (86 (86) 23/63)  
Civitanove Marche, Ospedale di Civitanova Marche, (ads), CIC 419, R. Centurioni, M. Mirabile (15 (18) 0/15)  
Como, Valduce Hospital, (ads), CIC 473, M.Turrini, F. Alberio, V. Saccà (10 (16) 0/10)  
Cremona, U.O. Ematologia CTMO, (ads), A. Molteni, P. Spedini (6 (9) 0/6)

Cuneo, Azienda Ospedale "S. Croce e Carle", (ads), CIC 606, N.Mordini (38 (50) 14/24)  
Ferrara, University of Ferrara, (ads), CIC 330, A. Cuneo (15 (28) 0/15)  
Florence, Azienda Ospedaliera Universitaria di Careggi, (ads, peds), CIC 304, R. Saccardi, F. Bambi (134 (148) 60/74)  
Foggia, Azienda Ospedaliero Universitaria, (ads), CIC 414, S. Capalbo, G. Spinosa (10 (10) 0/10)  
Genova, Ospedale San Martino, (ads), CIC 217, E. Angelucci (121 (137) 57/64)  
Genova, Istituto Giannina Gaslini, (peds), CIC 274, E. Lanino (24 (31) 12/12)  
Latina, Ospedale Santa Maria Goretti, (ads), CIC 379, E. Ortu la Barbera (26 (32) 0/26)  
Lecce, Ospedale Vito Fazzi de Lecce, (ads), CIC 868, N. Di Renzo (32 (40) 14/18)  
Milan, Azienda Socio Sanitaria Territoriale Fatebenefratelli Sacco, (ads), C. Bianchi, M. Bruno Vente (9 (9) 0/9)  
Milan, University of Milan IRCCS, (ads), CIC 265, G. Saporiti, F. Onida (53 (67) 17/36)  
Milan, Ospedale di Niguarda, (ads), CIC 294, R. Cairoli, G. Grillo (97 (113) 43/54)  
Milan, Istituto Europeo di Oncologia, (ads), CIC 331, R. Pastano. (48 (58) 16/32)  
Milan, Istituto Clinico Humanitas IRCCS, (ads), CIC 354, L. Castagna (133 (141) 64/69)  
Milan, Istituto Nazionale Tumori di Milano, (ads, peds), CIC 616, P. Corradini (94 (119) 20/74)  
Milan, Istituto Scientifico H.S. Raffaele, (ads, peds), CIC 813, F. Ciceri, M. Marcatti (144 (159) 75/69)  
Modena, University of Modena, (ads, peds), CIC 543, F. Narni, P. Bresciani, G. Palazzi (46 (57) 17/29)  
Monza, Ospedale San Gerardo, (peds), CIC 279, A. Bondi, A. Rovelli (25 (28) 25/0)  
Monza, Ospedale San Gerardo, Università Di Milano-Bicocca, (ads), CIC 544, P. Pioltelli, M. Parma (68 (83) 32/36)  
Napels, AORN Cardarelli Hospital, (ads), A. Picardi, M. Celentano, M. Pedata (52 (64) 7/45)  
Napels, Hospital Pausilipon, (peds), V. Poggi, M. Ripaldi (11 (11) 8/3)  
Napels, Federico II University, (ads), CIC 766, A. Risitano (19 (20) 9/10)  
Napels, National Cancer Institute IRCCS, (ads), CIC 839, G. Marcacci, A. Pinto (54 (73) 0/54)  
Novara, Ospedale Maggiore della Carita, (ads), CIC 867, G. Gaidano, L. Nassi (41 (53) 0/41)  
Nuoro, Ospedale San Francesco, (ads), CIC 793, G. Latte, A. Palmas (10 (11) 0/10)  
Padova, Istituto Oncologia Veneto IOV-IRCCS, (ads), D.Marino (10 (11) 0/10)  
Padova, Clinica di Oncoematologia Pediatrica, (peds), CIC 285, E. Calore, A. Biff (29 (33) 21/8)  
Padova, Padua University Hospital, (ads), CIC 853, G. Semenzato (41 (57) 0/41)  
Pagani, Hospital A. Tortora, (ads), C. Califano (7 (7) 0/7)  
Palermo, Ospedale die Bambini, (peds), CIC 109, O. Ziino (2 (2) 1/1)  
Palermo, ARNAS Civico Di Cristina, (ads), CIC 157, O. Ziino (8 (8) 0/8)  
Palermo, A.O.R. Villa Sofia Cervello, (ads), CIC 392, R. Scimè (70 (75) 31/39)  
Palermo, Ospedale 'La Maddalena', (ads), CIC 692, M. Musso, F. Porretto, A. Crescinanno (112 (133) 31/81)  
Parma, University of Palma, (ads), CIC 245, D. Vallisa, V. Rizzoli (34 (42) 14/20)  
Pavia, IRCCS Policlinico S. Matteo, (ads), CIC 286, P. Bernasconi, E.P. Alessandrino (75 (102) 39/36)  
Pavia, Policlinico IRCCS St. Matteo, (peds), CIC 557, M.Zecca (30 (38) 27/3)  
Pavia, IRCCS Policlinico San Matteo, (ads), CIC 562, P. Pedrazzoli (8 (23) 0/8)  
Perugia, Ospedale Santa Maria della Misericordia, (ads, peds), CIC 794, A. Velardi, A. Carotti (80 (94) 33/47)  
Pesaro, AORMN Hospital, (ads), CIC 529, G.Visani (39 (51) 14/25)  
Pescara, Ospedale Civile, (ads, peds), CIC 248, S. Santarone, P. Di Bartolomeo (92 (95) 33/59)  
Piacenza, Hospital Guglielmo da Saliceto, (ads), CIC 163, D.Vallisa (32 (39) 17/15)  
Pisa, University of Pisa, (ads, peds), CIC 795, M. Petrini, E. Benedetti, G. Casazza (58 (60) 21/37)  
Potenza, San Carlo Hospital, (ads), CIC 861, M. Pizzuti, M. Cimminiello (14 (19) 5/9)  
Ravenna, Romagna Metropolitan Transplant Network, (ads), CIC 306, F. Lanza (91 (135) 0/91)  
Reggio di Calabria, Grande Ospedale Metropolitan, Bianchi Melacrino Morelli, (ads, peds), CIC 587, G. Messina, M. Martino (89 (112) 28/61)  
Reggio Emilia, Arcispedale S. Maria Nuova, (ads), CIC 660, F. Merli, L. Facchini (39 (50) 11/28)  
Rionero in Vulture, IRCCS Referral Cancer Center of Basilicata, (ads), CIC 185, P. Musto (14 (22) 0/14)  
Rome, Università " La Sapienza", (ads, peds), CIC 232, R. Foa, A.P. Lori, S. Capria (95 (95) 34/61)  
Rome, Ospedale S. Camillo, (ads), CIC 287, L. Rigacci (26 (26) 8/18)  
Rome, Università Cattolica S. Cuore, (ads), CIC 307, S. Sica, P. Chiusolo, A. Bacigalupo (129 (166) 77/52)  
Rome, Rome Transplant Network, (ads), CIC 756, W. Arcese, P. De Fabritiis (143 (173) 61/82)  
Rome, IRRCS Ospedale Bambino Gesù, (peds), CIC 796, F. Locatelli (146 (167) 119/27)  
Salerno, AOU San Giovanni di Dio e Ruggi D'Aragona Hospital, (ads), CIC 928, C. Selleri, B. Serio (18 (23) 8/10)



San Giovanni Rotondo, Hospital Casa Sollievo Sofferenza, (ads, peds), CIC 526, AM. Carella (53 (61) 31/22)  
Sassari, Universita Di Sassari, (ads), CIC 870, F. Dore, L. Podda (21 (21) 0/21)  
Siena, Azienda Ospedaliera Universitaria Senese, (ads), CIC 321, G. Marotta, M. Tozzi (41 (49) 15/26)  
Taranto, Institute of Haematologie, Ospedale Nord, (ads), CIC 332, P. Mazza, G. Palazzo (33 (40) 13/20)  
Torino, A.O.U Citta della Salute e della Scienza di Torino, (ads), CIC 231, B. Benedetto (128 (162) 47/81)  
Torino, University Hospitals Torino, (ads), CIC 305, M.Berger, F. Fagioli, F. Carnevale, D.Cilloni, A.Cignetti (89 (107) 45/44)  
Treviso, Presidio Ospedaliero Treviso, (ads), CIC 415, F. Gherlinzoni (45 (58) 0/45)  
Tricase (Lecce), Hospital C. Panico, (ads), CIC 652, V. Pavone (50 (50) 17/33)  
Trieste, Istituto per l'Infanzia, IRCCS Burlo Garofolo, (peds), CIC 525, N. Maximova, M. Rabusin (9 (9) 6/3)  
Trieste, Azienda Sanitaria Universitaria Integrata di Treste, (ads), CIC 982, F. Zaja, G. Desabbata (18 (21) 0/18)  
Udine, Azienda Ospedaliero Universitaria di Udine, (ads), CIC 705, A. Sperotto, R. Fanin (95 (106) 56/39)  
Varese, Ospedale di Circolo e Fondazione Macchi, (ads), CIC 878, F. Passamonti, C. Chini (2 (2) 0/2)  
Venice, Ospedale dell'Angelo, (ads), CIC 502, R. Bassan, M. Vespignani (43 (47) 21/22)  
Verona, Policlinico G. B. Rossi, (ads, peds), CIC 623, F. Benedetti, S. Cesaro (92 (92) 52/40)  
Vicenza, Ospedale S. Bortolo, (ads), CIC 797, C. Borghero, M. Ruggeri (39 (45) 19/20)

**Jordan:** (1 team: 241 (253) 139/102)

Amman, King Hussein Cancer Centre, (ads, peds), CIC 580, A. Tbakhi (241 (253) 139/102)  
Amman, Arab Medical Center, (ads, peds), CIC 439, M. Sarhan (no report)  
Amman, Istishari Hospital, (ads), CIC 487, A. Ahmed Hussein (no report)

**Kazakhstan:** (1 team: 73 (73) 45/28)

Astana, National Research Center for Oncology and Transplantology, (ads), V. Kemaikin (73 (73) 45/28)

**Latvia:** (1 team: 34 (34) 3/31)

Riga, Clinic Linezers, (ads), S. Lejiniece, I. Trociukas (34 (34) 3/31)

**Lebanon:** (1 team: 85 (91) 38/47)

Beirut, American University of Beirut, (ads, peds), CIC 369, A. Bazarbachi (85 (91) 38/47)  
Bsalim, Middle East University Hospital, ads, peds, CIC 477, A. Ibrahim (no report)

**Lithuania:** (3 teams: 220 (259) 81/139)

Kaunas, University of Health Sciences Kauno Klinikos, (ads), CIC 942, R. Gerbutavicius (30 (41) 0/30)  
Vilnius, University Childrens Hospital, (peds), CIC 508, J. Rascon (17 (18) 14/3)  
Vilnius, Santariskiu Klinikos, (ads), CIC 644, L. Griskevicius, I. Trociukas (173 (200) 67/106)

**Luxembourg:** (1 team: 31 (32) 0/31)

Luxembourg, Center Hospitalier, (ads), S. De Wilde (31 (32) 0/31)

**Macedonia:** (1 team: 60 (60) 18/42)

Skopje, University Clinic for Haematology, (ads, peds), CIC 381, B. Georgievski (60 (60) 18/42)

**The Netherlands:** (14 teams: 1,503 (1,659) 599/904)

Amsterdam, Academic Med Centre, (ads), CIC 247, J. Zsivos, E. Nur (120 (120) 47/73)  
Amsterdam, VU University Medical Center, (ads), CIC 588, E. Meijer, G.J. Ossenkoppele (176 (197) 58/118)  
Amsterdam, Antoni Van Leeuwenhoek Hospital, (ads), CIC 976, S. C. Linn (12 (25) 0/12)  
Enschede, Medisch Spectrum Twente, (ads), CIC 360, M.R. Schaafsma, MC. Legdeur (36 (36) 0/36)  
Groningen, University Medical Centre UMCG, (ads), CIC 546, M.R. De Groot, G. Choi (175 (202) 98/77)  
Leiden, University Hospital, (ads, peds), CIC 203, J.H. Veelken (136 (139) 94/42)  
Maastricht, University Hospital, (ads), CIC 565, G. Van Gorkom (144 (164) 45/99)  
Nieuwegein, St. Antonius Hospital, (ads), CIC 200, H.K. Koene, O. de Weerd (31 (36) 0/31)  
Nijmegen, University Hospital, (ads), CIC 237, N. Schapp, T. De Witte (131 (146) 57/74)

Rotterdam, Erasmus MC Cancer Institute, (ads), CIC 246, J.J. Cornelissen, (248 (270) 103/145)  
The Hague, Haga Hospital Leyenburg, (ads), CIC 547, M.R. Schipperus, S. Kersting (51 (59) 0/51)  
Utrecht, University Medical Centre UMCU, (ads), CIC 239, E. Petersen (121 (130) 51/70)  
Utrecht, Princess Maxima Centre for Ped Oncology, (peds), CIC 352, M. Bierings (86 (89) 46/40)  
Zwolle, Isala Klinieken, (ads), CIC 548, J.L.L.M. Coenen (36 (46) 0/36)

**Nigeria:** (1 team: 4 (4) 4/0)

Benin, University Hospital Benin City, (peds), N. Bazuaye (4 (4) 4/0)

**Norway:** (5 teams: 395 (439) 142/253)

Bergen, Haukelands Sjukhus, (ads), CIC 197, A. Ahmed (63 (63) 8/55)  
Oslo, Oslo University Hospital, (ads, peds), CIC 235, T. Gedde-Dahl, J. Büchner (241 (279) 134/107)  
Oslo, The Norwegian Radium Hospital, (ads), CIC 782, G. Lauritzen, S. Kvaloy (32 (33) 0/32)  
Tromsø, University Hospital North Norway, (ads), A. Vik, G. Knutsen (19 (22) 0/19)  
Trondheim, St. Olavs Hospital, (ads), O. Hjertner (40 (42) 0/40)

**Poland:** (17 teams: 1,408 (1,552) 576/832)

Bydgoszcz, Nicolaus Copernicus University, (peds), CIC 764, J. Styczynski, R. Debski (26 (32) 23/3)  
Cracow, University Children's Hospital JUMC, (peds), CIC 507, J. Gozdzik (24 (27) 15/9)  
Cracow, Jagiellonian University CMUJ, (ads), CIC 553, A. Skotnicki (98 (109) 40/58)  
Gdansk, Medical University, (ads), CIC 799, M. Bieniaszewska (no report)  
Gliwice, Maria Curie Memorial Cancer Centre, (ads), CIC 428, S. Giebel (188 (217) 57/131)  
Katowice, Silesian Medical Academy, (ads), CIC 677, G. Helbig, M. Markiewicz (262 (286) 108/154)  
Lodz, Medical University of Lodz, (ads), CIC 171, T. Robak (37 (40) 7/30)  
Lublin, Childrens University Hospital, (peds), CIC 678, K. Drabko, J. Kowalczyk (18 (18) 15/3)  
Lublin, University Medical School, (ads), CIC 695, M. Wach, A. Walter-Croneck, W. Legiec (57 (72) 10/47)  
Poznan, University of Medical Sciences, Pediatric Hematology, (peds), CIC 641, J. Wachowiak (17 (21) 14/3)  
Poznan, Poznan University of Medical Sciences, (ads), CIC 730, L. Gil (123 (127) 66/57)  
Warsaw, Institute of Haematology and Blood Transfusion, (ads), CIC 693, K. Halaburda, B. Nasilowska, A. Tomaszewska (114 (129) 61/53)  
Warsaw, Marie Curie Institute, (ads), CIC 800, J. Walewski (66 (70) 0/66)  
Warsaw, Military Institute of Health Services, (ads), CIC 816, P. Rzepecki, K. Sulek (41 (44) 8/33)  
Warsaw, Central Clinical Hospital, (ads), CIC 954, G. Basak, P. Rusicka, W. Wiktor-Jedrzejczak, P. Boguradzki (85 (89) 35/50)  
Wroclaw, Lower Silesian Center, (ads), CIC 538, A. Lange (58 (58) 23/35)  
Wroclaw, University Hospital SPSK 1, (ads), CIC 699, T. Wrobel (118 (128) 41/77)  
Wroclaw, Cape of Hope Medical University, (peds), CIC 817, A. Chybicka, K. Kalwak, J. Owoc-Lempach (76 (85) 53/23)

**Portugal:** (6 teams: 466 (544) 113/353)

Coimbra, University Hospital, (ads), CIC 905, C. Geraldés, A. Do Cén Teixeira, L. Ribeiro (47 (57) 0/47)  
Lisbon, Instituto Portugues de Oncologia, (ads, peds), CIC 300, M. Abecasis (71 (77) 29/42)  
Lisbon, Hospital de Santa Maria, (ads, peds), CIC 636, F. Forjaz de Lacerda (78 (86) 25/53)  
Lisbon, H. St. Antonio dos Capuchos, (ads), CIC 826, A. Botelho de Sousa (60 (73) 0/60)  
Porto, Instituto Portugues de Oncologia, (ads, peds), CIC 291, A. Campos (140 (170) 50/90)  
Porto, Hospital St. Joao, (ads), CIC 329, J. E. Guimaraes, F. Trigo (70 (81) 9/61)

**Romania:** (5 teams: 263 (271) 86/177)

Bucharest, Fundeni Clinical Institute, (ads), CIC 427, A. Tanase (146 (150) 61/85)  
Bucharest, Coltea Clinical Hospital, (ads), CIC 912, A. Colita, A. Lupu, C. Ghimici (17 (18) 1/16)  
Bucharest, Fundeni Clinical Centre, (peds), CIC 935, A. Colita, L. Dumitrache (21 (22) 17/4)  
Targu-Mures, Sectia Clinica de Hematologie si, (ads), CIC 178, I. Benedek (53 (55) 0/53)  
Timisoara, Emergency Hospital Louis Turcanu, (ads, peds), CIC 174, M. Serban, C. Jinca (26 (26) 7/19)

**Russia:** (15 teams: 1,678 (1,848) 711/967)

Ekaterinburg, Regional Hospital No. 1, (ads), T.S. Konstantinova, V.A. Shalaev (58 (58) 20/38)  
Ekaterinburg, Royal Children's Hospital, (peds), CIC 884, L. Fechina (35 (37) 26/9)  
Moscow, Burnasyan Fed. Med. Biophysical Centre, (ads), A. Davtyan, A.E. Baranov (38 (48) 2/36)

Moscow, Cancer Research Center N. N. Blokhin, (ads), G. Petrova, K. Kirgizov (35 (41) 0/35)  
 Moscow, Central Clinical Hospital (CCHPA), (ads), , S. Shamansky (6 (9) 0/6)  
 Moscow, Main Military Clinical Hospital, (ads), O.A. Rukavitsyn (15 (15) 0/15)  
 Moscow, National Pirogov Medical Centre, (ads), V. Melnichenko, N. Mochkin (319 (320) 5/314)  
 Moscow, The Russian Children's Research Hospital, (peds), CIC 411, E. Skorobogatova (93 (99) 64/29)  
 Moscow, Federal Research Center for Pediatric Hematology, (peds), CIC 694, A. Maschan, D. Balachov (192 (226) 172/20)  
 Moscow, Research Haematology Center of RAS, (ads), CIC 930, V.G. Savchenko (259 (281) 105/154)  
 Moscow, Cancer Research Centre, peds, G. Mentkevich (no report)  
 Novosibirsk, Institute of Clinical Immunology, (ads), CIC 376, V. Sergeevuicheva (47 (47) 2/45)  
 Samara, Samara Kalinin Regional Hospital, ads, V.A. Rossiev (no report)  
 St. Petersburg, Federal Centre V.A. Almazov, (ads), A. Zaritskey, D. Motorin (66 (66) 66/0)  
 St. Petersburg, Russian Scientific and Research Institute of Haematology, (ads), S. Voloshin (49 (57) 2/47)  
 St. Petersburg, First State Pavlov Medical University, (ads, peds), CIC 725, B.V. Afanasyev, L. Zubarovskaya (351 (411) 231/120)  
 St. Petersburg, Research Institute of Oncology na N.N. Petrov, (ads, peds), CIC 845, S. Alekseev, I. Zyuzgin (115 (133) 16/99)

**Saudi Arabia:** (7 teams: 678 (707) 486/192)

Dammam, King Fahad Specialist Hospital, (ads, peds), CIC 441, H. Al-Hashmi (71 (72) 33/38)  
 Jeddah, King Faisal Hospital, (ads, peds), CIC 858, M. Bayoumi (73 (81) 56/17)  
 Riyadh, King Fahad Medical City, (ads, peds), CIC 159, M. Al-Harbi (34 (34) 13/21)  
 Riyadh, King Faisal Specialist Hospital, (ads, peds), CIC 397, M. Al Jurf (155 (159) 104/51)  
 Riyadh, King Abdul Aziz Medical City, (ads, peds), CIC 444, M. Al Zahrani (181 (186) 141/40)  
 Riyadh, Prince Sultan Military Medical City, (ads), CIC 818, S. Al Otaibi (21 (25) 2/19)  
 Riyadh, King Faisal Specialist Hospital, (peds), CIC 981, M. Ayas, A. AlSeraihy (143 (150) 137/6)

**Serbia:** (4 teams: 179 (185) 66/113)

Belgrade, Mother and Child Health Institute, (peds), CIC 358, D. Vujic (24 (26) 18/6)  
 Belgrade, Clinical Center of Serbia, (ads), CIC 373, M. Todorovic Balint (90 (90) 29/61)  
 Belgrade, Military Medical Academy, (ads), CIC 582, D. Stamatovic (55 (59) 18/37)  
 Novi Sad, Clinical Center of Vojvodina, (ads), CIC 655, A. Savic (10 (10) 1/9)

**Slovakia:** (5 teams: 215 (243) 80/135)

Banská Bystrica, Roosevelt Hospital, (ads), CIC 333, I. Markuljak, E. Kralikova (20 (22) 0/20)  
 Bratislava, National Cancer Institute, (ads), CIC 368, A. Vranovsky (66 (71) 5/61)  
 Bratislava, University Hospital, (ads), CIC 610, M.Mistik (87 (105) 61/26)  
 Bratislava, University Hospital, (peds), CIC 684, J. Horàková, I. Bodova (22 (25) 14/8)  
 Kosice, University Hospital, (ads), N. Stecova, T. Guman (20 (20) 0/20)

**Slovenia:** (1 team: 119 (144) 44/75)

Ljubljana, University Medical Centre, (ads, peds), CIC 640, M. Sever, V. Rajic (119 (144) 44/75)

**South Africa:** (11 teams: 338 (357) 151/187)

Bloemfontein, Free State University Hospital, (ads), J. Malherbe (10 (10) 0/10)  
 Cape Town, Melomed Hospital Tokai, (ads, peds), S. Nahrwar (6 (6) 2/4)  
 Cape Town, Netcare Kuils River Hospital, (ads), H. Koornhof (67 (72) 36/31)  
 Cape Town, Groote Schuur Hospital, (ads, peds), CIC 512, E. Verburgh (44 (44) 20/24)  
 Cape Town, Constantiaberg Medical Clinic, (ads), CIC 772, M. Du Toit (32 (33) 16/16)  
 Cape Town, UCT Private Academic Hospital, ads, peds, CIC 512, N. Novitzky (no report)  
 Durban, Inkosi Albert Luthuli Hospital, (ads, peds), S. Parasnath (14 (14) 6/8)  
 Durban, Netcare Umhlanga Hospital, (ads), N. Sewpersad (7 (7) 0/7)  
 Durban, Capital Haematology Hospital, J.P. Singh (no report)  
 Johannesburg, Baragwanath Hospital, (ads), M. Patel, V. Philips (17 (17) 0/17)  
 Johannesburg, Wits Donald Gordon Medical centre, (ads, peds), CIC 483, J. Thomson (19 (19) 10/9)  
 Pretoria, Netcare Pretoria East Hospital, (ads, peds), CIC 456, D. Brittain, A. McDonald (105 (118) 58/47)  
 Randburg, Netcare Olivedale Hospital, (ads), K. Gunther. D. Brittain (17 (17) 3/14)

**Spain:** 70 teams: 3,090 (3,317) 1,204/1,886)

Alicante, Hospital General, (ads), P. Fernandez Albellan (46 (46) 0/46)

Alicante, Hospital Universitario Torrecardenas, (ads), CIC 486, M.J. Garcia Perez (1 (1) 0/1)

Barakaldo Vizcaya, Hospital de Cruces, (ads, peds), CIC 393, J. Garcia-Ruiz, J. Mateos-Mazon (71 (82) 0/71)

Barcelona, Hospital Mutua de Terrassa, (ads), J. M. Marti Tutusaus (26 (31) 0/26)

Barcelona, Hospital Clinic, (ads), CIC 214, M. Rovira (93 (101) 48/45)

Barcelona, Santa Creu i Sant Pau, (ads), CIC 260, J. Sierra, S. Brunet, A. Esquirol (70 (75) 35/35)

Barcelona, Santa Creu i San Pau, (peds), CIC 260, I. Badell Serra, M. Torrent (9 (13) 9/0)

Barcelona, Hospital M. Infantil, Vall d'Hebron, (peds), CIC 422, C. Diaz de Heredia (32 (41) 24/8)

Barcelona, Hospital General Vall d'Hebron, (ads), CIC 584, D. Valcarcel (69 (74) 37/32)

Barcelona, Hospital Germans Trias i Pujol, (ads), CIC 613, J.M. Ribera Santasusana (57 (59) 28/29)

Barcelona, Hospital Sant Joan de Deu, (peds), CIC 668, I. Badell-Serra (14 (14) 10/4)

Barcelona, Institute Catala d'Oncologia, Hospital Duran i Reynals, (ads), CIC 759, R. Parody Porras, A. Sureda (92 (95) 38/54)

Caceres, Hospital San Pedro de Alcantara, (ads), J. Prieto, JM. Bergua (29 (29) 0/29)

Cadiz, Hospital del SAS, (ads, peds), S. Garzon Lopez (38 (44) 21/17)

Cadiz, Hospital Universitario Puerta del Mar, (ads), CIC 679, A. Paz Coll (no report)

Garcia-Boyer (23 (24) 0/23)

Cordoba, Hospital Reina Sofia, (ads, peds), CIC 238, C. Herrere Arroyo, C. Martin Calvo, V. Martin Palanco (73 (79) 38/35)

Galdakao, Hospital de Galdakao, (ads), J.Ojanguren, T.Carrascosa, K.Atutxa (25 (25) 0/25)

Girona, Institut Catala d'Oncologia, Josep Trueta, (ads), CIC 433, D. Gallardo (20 (20) 0/20)

Granada, Hospital Virgen de la Nieves, (ads, peds), CIC 559, M. Jurado Chacon (58 (63) 25/33)

Jaen, Hospital Ciudad de Jaen, (ads), F. Almagro Torres (16 (18) 0/16)

La Coruna, Complejo Hospitalario de A Coruna, (ads), CIC 361, J.P. Torres Carrete, M.R. Varela Gomez (65 (70) 23/42)

La Laguna, Tenerife, University Hospital Canary Isles, (ads), M.T. Hernandez-Garcia, B. Soris S. Barbara (23 (23) 0/23)

Las Palmas Canary Isles, Hospital Insular, (ads, peds), J. Gonzalez-San Miguel (24 (24) 0/24)

Las Palmas Canary Isles, Hospital de Gran Canaria 'Dr. Negrin', (ads, peds), CIC 537, MT Gómez, M.del Mar Perera, L.Gonzalez, L.Guerra, A.Suarez, H.Luzardo (53 (54) 30/23)

Leon, Hospital Universitario de Leon, (ads), CIC 426, F. Ramos, N de Las Heras (15 (15) 0/15)

Lleida, Hospital Arnau de Vilanova, (ads), CIC 885, A. Garcia Guinon (7 (7) 0/7)

Logrono, Hospital San Pedro, La Rioja, (ads), CIC 917, M. Najera Irazu, M. Del Mar Hermosilla (no report)

Lugo, Hospital Lucus Augusti, (ads), J. Arias Sampedro (12 (14) 0/12)

Madrid, Clinica Moncloa, (ads), A. Escudero, J. Fernandez-Ranada (8 (8) 0/8)

Madrid, Hospital Principe Asturias, Alcala de Henares, (ads), Dr. Lopez Rubio, E. Magro Mazo (10 (10) 0/10)

Madrid, Hospital Quiron, (ads), JM. Fernandez-Ranada, A. Escudero (22 (23) 6/16)

Madrid, Hospital Severo Ochoa, Leganés, (ads), P. Sanchez Godoy (5 (5) 0/5)

Madrid, Hospital Universitario de Getafe, (ads), L.Garcia Alonson, F.Oña Compan, N.Somolinos, C.Monteserin (15 (15) 0/15)

Madrid, Hospital Universitario San Carlos, (ads), M.Paz Martin, C. Benavente (13 (13) 0/13)

Madrid, Hospital de la Princesa, (ads), CIC 236, A. Figuera, A. Alegre (61 (61) 36/25)

Madrid, Fundacion Jimenez Diaz, (ads), CIC 309, J.L. Lopez-Lorenzo (53 (53) 20/33)

Madrid, Hospital Doce de Octubre, (ads, peds), CIC 382, J. Martinez, J. de la Serna (91 (91) 28/63)

Madrid, Hospital Univeristario Materno Infantil Gregorio Maranon, (peds), CIC 410, C. Belendez (16 (16) 14/2)

Madrid, Hospital Ramon y Cajal, (ads), CIC 615, J. Lopez-Jiménez (85 (85) 34/51)

Madrid, Hospital Universitario Puerta de Hierro, (ads), CIC 728, JR Cabrera Martin (41 (41) 22/19)

Madrid, Hospital Niño Jesus, (peds), CIC 732, M.A. Diaz (38 (50) 29/9)

Madrid, Hospital Universitario La Paz, (ads, peds), CIC 734, A. Perez Martinez, R. De Paz (76 (77) 40/36)

Madrid, Hospital Universitario Sanitas La Zarzuela, (ads), CIC 779, R. De la Camara (6 (6) 0/6)

Madrid, Hospital General Universitario Gregorio Maranon, (ads), CIC 819, J.L. Diez-Martin, P. Balsalobre (65 (73) 47/18)

Madrid, Hospital Universitario Sanchinarro, ads, J. Pérez de Oteyza (no report)

Malaga, Hospital Virgen de la Victoria, (ads), CIC 476, A. Rosell Mas (15 (17) 0/15)  
Malaga, Hospital Regional Malaga, (ads, peds), CIC 576, M-J. Pascual-Cason (148 (152) 64/84)  
Murcia, Hospital Virgen de la Arrixaca, (ads, peds), CIC 323, JM. Moraleda, A. Sanchez-Salinas (59 (70) 26/33)  
Murcia, Hospital General Universitario Morales Meseguer, (ads, peds), CIC 735, I. Heras, V. Vicente-Garcia (51 (56) 20/31)  
Orense, Com. Hospital Cristal-Pinor, ads, J-L. Sastre-Moral (no report)  
Oviedo, Hospital Covadonga, Central Asturias, (ads, peds), CIC 642, S. Gonzalez-Muniz (83 (86) 28/55)  
Palma de Mallorca, Hospital son Llatzer, (ads), CIC 110, J. Bargay-Lleonart (15 (15) 0/15)  
Palma de Mallorca, Hospital Universitario Son Espases, (ads), CIC 722, A. Sampol (52 (60) 20/32)  
Pamplona, Hospital de Navarra, (ads), CIC 577, T. Zudaire (37 (40) 15/22)  
Pamplona, Clinica Universitaria de Navarra, (ads, peds), CIC 737, J. Rifon (33 (37) 18/15)  
Pontevedra, Hospital Montecelo, (ads), A-M. Dios Loureiro (10 (13) 0/10)  
Salamanca, Hospital Clinico, (ads, peds), CIC 727, D. Caballero (128 (138) 58/70)  
San Sebastian, Hospital Universitario Donostia, (ads, peds), C. Vallejo Llamas, JJ Ferreiro Martinez (99 (115) 57/42)  
Santander, Hospital Universitario Marqués de Valdecilla, (ads, peds), CIC 242, M. Colorado Araujo (68 (76) 35/33)  
Santiago de Compostela, Hospital Clinico Universitario, (ads, peds), CIC 570, J.L. Bello Lopez (48 (53) 20/28)  
Sevilla, Hospital Universitario Virgen del Rocio, (ads, peds), CIC 769, I. Esteban Martín-Retortillo, I. Espigado (127 (127) 56/71)  
Tarragona, Hospital Joan XXIII de Tarragona, (ads), C. Talarn Forcadell (26 (26) 0/26)  
Tenerife Canary Isles, Hospital N. S. De la Candelaria, (ads, peds), J. Garcia-Talavera, J. Breña, P. Rios Rull (36 (37) 0/36)  
Valencia, Hospital Arnau de Vilanova de Valencia, (ads), A. Lopez Martinez (7 (7) 0/7)  
Valencia, Hospital Doctor Peset, (ads), P. Ribas-Garcia (22 (23) 0/22)  
Valencia, Instituto Valenciano de Oncologia, (ads), A. Avaria, C. Salazar (2 (2) 0/2)  
Valencia, Hospital Clinico de Valencia, (ads, peds), CIC 282, C. Solano (73 (80) 31/42)  
Valencia, Hospital Universitario La Fe, (peds), CIC 653, J.M. Fernandez Navarro (21 (25) 17/4)  
Valencia, Hospital Universitario La Fe, (ads), CIC 663, J. Sanz, G.F.Sanz (132 (151) 67/65)  
Valladolid, Hospital Rio Hortega, (ads), CIC 611, J. Garcia Frade (26 (27) 8/18)  
Vigo, CHUVI Hospital Alvaro Cunqueiro, (ads), CIC 421, C. Albo Lopez (41 (50) 13/28)  
Zaragoza, Clinico Universitario Lozano Blesa, (ads), L. Palomera Bernal (26 (26) 0/26)  
Zaragoza, Hospital Miguel Servet, (ads, peds), P. Delgado (39 (40) 9/30)

**Sweden:** (7 teams: 771 (864) 291/480)

Goteborg, CHECT Sahlgrenska University Hospital, (ads, peds), CIC 289, J. Johansson, K. Mellgren (124 (130) 40/84)  
Linköping, University Hospital, (ads), CIC 740, J. Cammenga (69 (77) 17/52)  
Lund, University Hospital, (ads, peds), CIC 283, S. Lenhoff, J. Toporski (132 (150) 66/66)  
Örebro, Medical Center Hospital, (ads), CIC 738, P. Kozlowski (26 (33) 0/26)  
Stockholm, Karolinska University Hospital, (ads, peds), CIC 212, S. Mielke, J. Winiarski, P. Ljungman (223 (254) 94/129)  
Umea, Umea University Hospital, (ads), CIC 731, C. Isaksson (63 (69) 20/43)  
Uppsala, University Hospital, (ads, peds), CIC 266, K. Carlson, N. Jackmann (134 (151) 54/80)

**Switzerland:** (10 teams: 675 (799) 240/435)

Aarau, Kantonsspital Aarau, (ads), CIC 316, M. Bargetzi (28 (42) 0/28)  
Basel, Universitätsspital Basel, (ads, peds), CIC 202, J. Passweg, D. Heim, J. Halter (119 (138) 85/34)  
Bellinzona, Ospedale San Giovanni, (ads), CIC 829, L. Wannesson (13 (19) 0/13)  
Bern, Inselspital, (ads, peds), CIC 221, T. Pabst, J. Rössler, G. Baerlocher (143 (174) 0/143)  
Geneva, Hôpital Cantonal Universitaire, (ads, peds), CIC 261, Y. Chalandon, M. Ansari (71 (73) 71/0)  
Lausanne, CHUV, (ads, peds), CIC 820, M. Duchosal (71 (81) 0/71)  
St. Gallen, Kantonsspital, (ads, peds), CIC 324, U. Hess, F. Hitz (37 (47) 0/37)  
Zurich, University Hospital, (ads), CIC 208, U. Schanz, G. Nair (141 (168) 61/80)  
Zurich, Universitäts Kinderklinik, (peds), CIC 334, T. Güngör (26 (29) 23/3)  
Zurich, Hospital Hirslanden, (ads), CIC 638, Ch. Renner (26 (28) 0/26)

**Syria:** (1 team: 10 (10) 6/4)

Damascus, Tishreen Hospital, (ads), CIC 10853, De. S. Elias (10 (10) 6/4)

**Tunisia:** (1 team: 85 (91) 41/44)

Tunis, National BMT Centre, (ads, peds), CIC 183, B. Othman Tarck (85 (91) 41/44)

**Turkey:** (72 teams: 4,631(4,859) 2,274/2,357)

Adana, Cukurova University Balcali Hospital, (peds), G. Inan (43 (43) 38/5)

Adana, Adana Acibadem Hospital, (peds), CIC 454, A. Antmen (67 (75) 62/5)

Adana, Balcali Hospital, Cukurova University, (ads), CIC 462, B. Güvenc (28 (28) 11/17)

Adana, Baskent University Adana, (ads), CIC 589, H. Ozdogu, C. Boga, S. Asma (136 (143) 72/64)

Ankara, Ankara Baskent Hospital, (ads) S. Zeynep Aki, E. Koca (9 (10) 0/9)

Ankara, Dr. A. Yurtaslan Oncology Training and Research Hospital, (ads, peds), F. Altuntas, M. Sinan Dal (120 (120) 45/75)

Ankara, Liv Hospital, (ads), O. Nevruz (40 (40) 5/35)

Ankara, Lösante Hospital, (peds), A.Emin Kurekci (28 (29) 26/2)

Ankara, Memorial Hospital Ankara, (ads), F. Avcu (65 (66) 25/40)

Ankara, Private Medicana International Hospital, (ads), E. Soydan (162 (162) 84/78)

Ankara, SBU Gülhane Training and Research Hospital, (ads), N. Karadurmus, O. Gürsel (89 (89) 0/89)

Ankara, Yildirim Bayazit Training and Research Hospital, (ads), M. Albayrak (13 (13) 0/13)

Ankara, Hacettepe University Medical School, Sihhiye, (ads), CIC 168, H. Goker (85 (85) 29/56)

Ankara, Gazi University Medical School, Besevler, (ads), CIC 169, Z.N. Ozkurt, Ö. Karacaoglu (77 (91) 44/33)

Ankara, Gazi University Medical School, Besevler, (peds), CIC 182, U. Kocak (19 (21) 17/2)

Ankara, Hacettepe Ihsan Dogramaci Childrens Hospital, (peds), CIC 399, D. Uckan-Cetinkaya, B. Kuskonmaz (16 (17) 16/0)

Ankara, Ankara Bayindir Hospital, (ads), CIC 412, A.Ural (32 (45) 19/13)

Ankara, Children's State Hospital, (peds), CIC 436, B. Tunc (49 (53) 45/4)

Ankara, Ankara University Faculty of Medicine, Dikimevi, (ads), CIC 617, P. Topguoglu, G. Gürmann, M. Kurt Yüksel (98 (111) 47/51)

Ankara, University of Ankara, Cebeci, (peds), CIC 620, T. Lleri, E. Unal (37 (41) 28/9)

Ankara, Numune Education and Research Hospital, (ads), CIC 691, G. Özet (34 (38) 5/29)

Ankara, Memorial Hospital Ankara, (peds), A. Demir (no report)

Ankara, Özel Koru Hospital, ads, A. Ugur Bilgin (no report)

Ankara, GATA BMT Centre, Etlik, CIC 372, M. Ozturk (no report)

Antalya, Akdeniz University Medical School, (peds), CIC 618, A. Kupesi (46 (48) 45/1)

Antalya, Akdeniz University School of Medicine, (ads), CIC 685, L. Undar (34 (38) 11/23)

Antalya, Medstar Antalya Hospital, Cakirlar, (ads, peds), CIC 864, I. Karadogan (124 (125) 46/78)

Antalya, Medical Park Antalya Hospital, Lara, (peds), CIC 911, A. Yesilipek (110 (117) 109/1)

Antalya, Antalya Education and Research Hospital, (ads), CIC 914, E. Kurtoglu, I. Nizam Özen (49 (50) 12/37)

Antalya, Medical Park Hospitals, (ads), CIC 919, Y. Koc (48 (59) 32/16)

Atakum, Özel Sansung Medicalpark Hospital, (peds), CIC 881, H.E. Ozyurek (9 (9) 9/0)

Aydin, Adnan Menderes University Medical Faculty, (ads), CIC 187, Z. Bolaman, I. Yavasoglu (57 (63) 21/36)

Bursa, Uludag University School of Medicine, (ads), V. Özkocaman (54 (54) 16/38)

Bursa, Uludag University School of Medicine, (peds), AM. Günes, M. Evim (13 (13) 13/0)

Denizli, Pamukkale University Hospital, (ads), S. Kabukcu (43 (43) 0/43)

Diyarbakir, Dicle University Faculty, (ads), O. Ayyildiz (12 (12) 0/12)

Erzurum, Atatürk University, (ads), Y. Bilen (no report)

Eskisehir, Osmangazi University, (ads), E. Gündüz (50 (50) 8/42)

Gaziantep, Gaziantep University Medical School, (ads), CIC 402, M. Pehlivan (33 (33) 6/27)

Istanbul, Acidadem Atakent Hospital, (ads), S. Sami Karti, A. Uzay (197 (226) 73/124)

Istanbul, Bahcelievler Medical Park Hospital, (ads, peds), G. Sucak (97 (107) 62/35)

Istanbul, Hisar Intercontinental Hospital, (ads), A. Timuragaoglu (63 (63) 26/37)

Istanbul, Medical Park Goztepe, (peds), G. Karasu, SC. Kilic (86 (101) 81/5)

Istanbul, Medical Park Göztepe, (ads), C.Adigüzel (112 (112) 36/76)

Istanbul, Sisli Memorial Hospital, (ads), S. Izmir Güner (86 (86) 44/42)

Istanbul, Yeditepe Universtity Hospital, (peds), BE. Del Castello (16 (16) 15/1)

Istanbul, Emsey Hospital, (ads), CIC 355, S. Omay, Y. Ünsal (56 (56) 27/29)

Istanbul, Yeditepe University Hospital, (ads), CIC 416, A. Özkan (35 (37) 12/23)

Istanbul, Istanbul Medipol University, (ads), CIC 445, D. Sargin (76 (76) 29/47)  
 Istanbul, Istanbul Medipol University, (peds), CIC 446, Y. Yaman, S. Anak (46 (46) 34/12)  
 Istanbul, Acibadem University Altunizade Hospital, (peds), CIC 457, G. Öztürk (72 (74) 69/3)  
 Istanbul, Yeniuyuzil University, Gaziosmanpasa Hospital, (peds), CIC 459, B. Malbora (58 (58) 58/0)  
 Istanbul, Acibadem University Altunizade Hospital, (ads), CIC 468, S. Ratip, E. Ovali (70 (70) 29/41)  
 Istanbul, Yeniuyuzil University, Gaziosmanpasa Hospital, (ads), CIC 475, H. Goksoy (134 (134) 55/79)  
 Istanbul, Marmara University Hospital, (ads), CIC 714, T. Firatli-Tuglular, T. Toptas (45 (45) 15/30)  
 Istanbul, University of Istanbul, (ads), CIC 760, I. Yonal-Hindilerden, M. Aktan (41 (44) 15/26)  
 Istanbul, Cerrahpasa Medical Faculty, (ads), CIC 761, T. Soysal, M. Cem Ar (46 (53) 12/34)  
 Istanbul, Koç University Hospital, (ads, peds), CIC 943, O. Akay (53 (60) 9/44)  
 Istanbul, Florence Nightingale Sisli Hospital, (ads), CIC 994, M. Arat (119 (119) 73/46)  
 Istanbul, Medical Park Bahcelievler Hospital, (peds), CIC 448:2, T. Fisgin, C. Bozkurt (73 (80) 70/3)  
 Istanbul, Sisli Memorial Hospital, peds, A. Tanyeli (no report)  
 Istanbul, Kolan International Hospital, ads, S. Dincer (no report)  
 Izmir, Kent Hospital, (ads), G. Kadiköylü (86 (86) 33/53)  
 Izmir, Medicalpark Private Hospital, Karsiyaka, (ads, peds), S.Cagirgan, Kahraman, C. Acarlar (108 (108) 56/52)  
 Izmir, Tepecik Research and Educational Hospital, (peds), H. Öniz (4 (4) 4/0)  
 Izmir, Ege University Medical Faculty, Bornova, (peds), CIC 621, S. Kansoy (37 (41) 33/4)  
 Izmir, Ege University Medical Faculty, Bornova, (ads), CIC 628, F. Vural, G. Saydam, N. Soyer (92 (92) 35/57)  
 Izmir, Dokuz Eylul University, (ads, peds), CIC 688, G. H. Özsan. H. Ören (46 (46) 10/36)  
 Kayseri, Erciyes University Hospital, (ads), CIC 627, A. Unal, M. Cetin (125 (127) 48/77)  
 Kayseri, Erciyes University Faculty of Medicine, (peds), CIC 913, M. Karakukcu (50 (61) 39/11)  
 Kocaeli, Kocaeli University Hospital, (ads), P. Tarkun (14 (16) 0/14)  
 Kocaeli, Kocaeli University Hospital, (peds), E. Zengin (6 (6) 5/1)  
 Kocaeli, Anadolu Medical Center Hospital, (ads), CIC 440, Z. Gülbas (269 (291) 120/149)  
 Konya, Necmettin Erbakan, Meram University Medical Hospital, (ads), Ö. Cenedi (5 (5) 0/5)  
 Malatya, Inonu University Targut Özal Medical Centre, (ads), M. Ali Erkurt, E. Kaya (222 (222) 79/143)  
 Malatya, İnönü University Hospital, peds, A. Akyay (no report)  
 Manisa, Celal Bayer University, (ads), I. Aydogdu (19 (19) 1/18)  
 Samsun, Ondokuz Mayıs University, (peds), C. Albayrak (15 (15) 13/2)  
 Trabzon, Karadeniz Technical University, (ads), M. Sonmez (23 (23) 8/15)

**Ukraine:** (4 teams: 128 (149) 13/115)

Kiev, Kiev City BMT Center, (ads, peds), E. Karamanesht, V. Khomenko, I. Korenkova (59 (68) 0/59)  
 Kiev, National Cancer Institute, (peds), S. Pavlyk (23 (34) 0/23)  
 Kiev, National Pediatric Specialized Hospital, OHMATDYT, (peds), CIC 10109, O. Lysytsia (20 (21) 13/7)  
 Kiev, National Cancer Centre, (ads), CIC 10832, K. Filonenko (26 (26) 0/26)

**United Kingdom:** (51 teams: 4,063 (4,476) 1,615/2,448)

Aberdeen, The Royal Infirmary, (ads, peds), CIC 344, D.J.Culligan (26 (27) 0/26)  
 Bangor, Ysbyty Gwynedd, (ads), CIC 736, D. Edwards (4 (4) 0/4)  
 Bath, Royal United Hospital, (ads), CIC 619, J. Crowe (19 (20) 0/19)  
 Belfast, Belfast City Hospital Trust, (ads), CIC 268, D. Finnegan (62 (66) 12/50)  
 Birmingham, Heartlands Hospital, (ads), CIC 284, M. Nikolousis, S. Paneesha (80 (87) 32/48)  
 Birmingham, Queen Elizabeth Hospital, (ads, peds), CIC 387, R. Malladi (177 (188) 81/96)  
 Birmingham, The Birmingham Children's Hospital, (peds), CIC 781, S. Lawson (32 (33) 22/10)  
 Blackpool, Victoria Hospital, (ads), CIC 832, M.P. Macheta (37 (43) 0/37)  
 Bournemouth, Royal Bournemouth Hospital, (ads), CIC 765, R. Hall (21 (26) 0/21)  
 Bristol, Avon and Royal Hospital for Sick Children, (ads, peds), CIC 386, R. Protheroe, D. Marks, S. Robinson (117 (132) 71/46)  
 Cambridge, Addenbrooke's Hospital, (ads, peds), CIC 566, C.Crawley, J Craig (131 (150) 66/65)  
 Cardiff/Swansea, University Hospital of Wales, (ads, peds), CIC 303, K.M.O. Wilson, P. Connor, W. Ingram (129 (142) 44/85)  
 Cheltenham, Cheltenham General Hospital, (ads), CIC 398, S. Chown (23 (26) 0/23)  
 Coventry, University Hospital Coventry & Warwickshire NHS Trust, (ads), CIC 322, F. Jones (21 (24) 0/21)  
 Dudley, Dudley NHS Trust, (ads), CIC 405, S. Fernandes (11 (11) 0/11)  
 Dundee, Ninewells Hospital, (ads), CIC 719, D. Meiklejohn (9 (9) 0/9)

Edinburgh, The Western General Hospital, (ads), CIC 228, A. J.M. Broom, F.Scott, P.Roddie (54 (57) 0/54)  
Exeter, Royal Devon and Exeter Hospital, (ads), CIC 571, P. Kerr (22 (24) 0/22)  
Glasgow, Beatson, West of Scotland Cancer Centre, (ads, peds), CIC 244, I.G. McQuaker, A. Parker (167 (180) 78/89)  
Glasgow, Royal Hospital for Children, (peds), CIC 707, B. Gibson (19 (31) 13/6)  
Leeds, Yorkshire Hospitals NHS Trust, (ads, peds), CIC 254, M. Gilleece, J.Ashcroft. R. Patmore (189 (210) 74/115)  
Leicester, Royal Infirmary Hospital, (ads), CIC 713, M. Martin (57 (61) 20/37)  
Liverpool, Royal Liverpool University Hospital, (ads), CIC 501, A. Patel, R. Salim (82 (87) 32/50)  
Liverpool, Alder Hay, (peds), CIC 773, M. Caswell (7 (7) 0/7)  
London, Hammersmith Hospitals NHS Trust, (ads), CIC 205, J.Apperley, E. Kanfer, D. Slade, R. Szydlo (135 (146) 55/80)  
London, Royal Marsden Hospital, (ads, peds), CIC 218, M. Potter (190 (226) 73/117)  
London, University College Hospital, (ads, peds), CIC 224, B. Carpenter (391 (429) 151/240)  
London, Great Ormond Street Hospital, (peds), CIC 243, P. Veys (77 (93) 59/18)  
London, The London Clinic, (ads), CIC 263, M. Potter (28 (30) 8/20)  
London, Parkside Hospital, (ads), CIC 450, R. Powles (1 (1) 0/1)  
London, London Bridge Hospital, (ads), CIC 460, M. Kazmi (17 (17) 0/17)  
London, St. George's Hospital, (ads), CIC 539, M. Koh, M. Klammer (48 (51) 24/24)  
London, King's College Hospital, (ads), CIC 763, G. Mufti, V. Potter (200 (207) 83/117)  
London, St. Bartholomew's and the Royal London NHS Trust, (ads), CIC 768, J. Gribben, S. Montoto, J. Cavenagh, S. Agrawal (151 (166) 42/109)  
London, St Mary's Hospital, (peds), CIC 866, J de La Fuente (28 (28) 28/0)  
Manchester, Central Manchester NHS Trust, (peds), CIC 521, R. F. Wynn (42 (47) 40/2)  
Manchester, The Royal Infirmary, (ads), CIC 601, E. Tholouli (138 (151) 76/62)  
Manchester, Christie NHS Trust Hospital, (ads, peds), CIC 780, A.Bloor (125 (131) 65/60)  
Newcastle upon Tyne, Freeman Hospital, (ads, peds), CIC 276, M. Collins, M. Slatter (230 (240) 119/111)  
Norwich, The Norfolk and Norwich University Hospital, (ads), CIC 391, M. Lawes (16 (17) 0/16)  
Nottingham, Nottingham City Hospital, (ads), CIC 717, J.L. Byrne (154 (174) 53/101)  
Oxford, Cancer and Haematology Centre, Churchill Hospital, (ads), CIC 255, A. Peniket, T.Littlewood, A.Brown, G.Collins (144 (148) 65/79)  
Oxford, John Radcliffe Children's Hospital, (peds), CIC 603, G. Hall (3 (5) 0/3)  
Plymouth, University Hospitals Plymouth NHS Trust, (ads), CIC 823, H.M.Hunter (78 (86) 38/40)  
Poole, Poole Hospital NHS Foundation Trust, (ads), CIC 458, J. Fergus (6 (7) 0/6)  
Sheffield, Teaching Hospitals NHS Trust , Children's Hospital, (ads), CIC 778, J.Snowden (122 (140) 36/86)  
Sheffield, Childrens NHS Foundation, (peds), CIC 933, K. Patrick (19 (26) 10/9)  
Southampton, University Hospital Southampton NHS Foundation Trust, (ads, peds), CIC 704, K. Orchard, D. Richardson (165 (200) 45/120)  
Stoke-on-Trent, University Hospitals of North Midlands, (ads), CIC 394, S. Pillai, R. Chasty (23 (26) 0/23)  
Swindon, Great Western Hospital, (ads), CIC 608, N. E. Blesing (19 (20) 0/19)  
Taunton, Taunton and Somerset NHS Foundation Trust, (ads), CIC 708, S. Bolam (17 (19) 0/17)

Europe total: 700 teams: (43,581 (48,512) 18,563/25,018)
